## **<sup>68</sup>Ga-PSMA-11 PET/CT for prostate cancer staging and risk stratification in Chinese patients**

**Shiming Zang<sup>1,\*</sup>, Guoqiang Shao<sup>1,\*</sup>, Can Cui<sup>1</sup>, Tian-Nv Li<sup>2</sup>, Yue Huang<sup>3</sup>, Xiaochen Yao<sup>1</sup>, Qiu Fan<sup>1</sup>, Zejun Chen<sup>4</sup>, Jin Du<sup>5</sup>, Ruipeng Jia<sup>6</sup>, Hongbin Sun<sup>6</sup>, Zichun Hua<sup>7</sup>, Jun Tang<sup>8</sup>, Feng Wang<sup>1</sup>**

<sup>1</sup>Department of Nuclear Medicine, Nanjing First Hospital, Nanjing Medical University, Nanjing 210006, China

<sup>2</sup>Department of Nuclear Medicine, PET Centre, No. 1 Hospital Affiliated to Nanjing Medical University, Nanjing 210029, China

<sup>3</sup>Department of Pathology, Nanjing First Hospital, Nanjing Medical University, Nanjing 210006, China

<sup>4</sup>Department of Nuclear Medicine, The Affiliated Jiangyin Hospital of Southeast University Medical College, Jiangyin 214400, China

<sup>5</sup>Department of Technology Development, China Isotope Radiation Corporation, No. 1 Nansixiang, Sanlihe, West District, Beijing 100045, China

<sup>6</sup>Department of Urology, Nanjing Medical University, Nanjing 210006, China

<sup>7</sup>The State Key Laboratory of Pharmaceutical Biotechnology, Department of Biochemistry, College of Life Sciences, Nanjing University, Nanjing 210006, China

<sup>8</sup>Department of Nuclear Medicine, The Second Affiliated Hospital of Soochow University, Suzhou 215004, China

\*These authors have contributed equally to this work

**Correspondence to:** Feng Wang, **email:** fengwangcn@hotmail.com  
Hongbin Sun, **email:** docshb@126.com

**Keywords:** treatment-naïve prostate cancer, prostate-specific membrane antigen, metastatic castrate-resistant prostate cancer, staging, risk stratification

**Received:** July 22, 2016

**Accepted:** December 27, 2016

**Published:** January 17, 2017

### **ABSTRACT**

**We evaluated the clinical utility of <sup>68</sup>Ga-PSMA-11 PET/CT for staging and risk stratification of treatment-naïve prostate cancer (PCa) and metastatic castrate-resistant prostate cancer (mCRPC). Twenty-two consecutive patients with treatment-naïve PCa and 18 with mCRPC were enrolled. <sup>68</sup>Ga-PSMA-11 PET/CT and magnetic resonance imaging (MRI) were performed for the evaluation of primary prostatic lesions, and bone scans were used for evaluation bone metastasis. Among the 40 patients, 37 (92.5% [22 treatment-naïve PCa, 15 mCRPC]) showed PSMA-avid lesions on <sup>68</sup>Ga-PSMA-11 images. Only 3 patients with stable mCRPC after chemotherapy were negative for PSMA. The sensitivity, specificity and accuracy of <sup>68</sup>Ga-PSMA-11 imaging were 97.3%, 100.0% and 97.5%, respectively. The maximum standardized uptake (SUV<sub>max</sub>) of prostatic lesions was 17.09 ± 11.08 and 13.33 ± 12.31 in treatment-naïve PCa and mCRPC, respectively. <sup>68</sup>Ga-PSMA-11 revealed 105 metastatic lymph nodes in 15 patients; the SUV<sub>max</sub> was 16.85 ± 9.70 and 7.54 ± 5.20 in treatment-naïve PCa and mCRPC, respectively. <sup>68</sup>Ga-PSMA-11 PET/CT also newly detected visceral metastasis in 9 patients (22.5%) and bone metastasis in 29 patients (72.5%). <sup>68</sup>Ga-PSMA-11 PET/CT exhibits potential for staging and risk stratification in naïve PCa, as well as improved sensitivity for detection of lymph node and remote metastasis.**

### **INTRODUCTION**

Prostate cancer (PCa) is the most common solid neoplasm in men and the second leading cause of cancer-related death in men in Europe and the United States [1, 2]. Early detection of localized disease results in

a five-year survival rate of nearly 100%. On the other hand, tumor metastasis leads to dramatically reduced survival rates. Prostate-specific antigen (PSA) screening and active surveillance are helpful, but may lead to over-diagnosis and overtreatment, as the majority of PCa are indolent and progress very slowly [3]. Consequently,

precise characterization is critical for appropriate clinical management of PCa.

In China, the incidence of PCa is increasing, in part due to lifestyle changes during the last decade. Up to now, however, the epidemiology of PCa in China has been unclear, as have the phenotypes and heterogeneity among Chinese patients [4–6]. PSA screening system has not been established, and a majority of patients are already at an advanced stage at their initial diagnosis. Radical prostatectomy is not an option, leaving androgen-deprivation therapy as the main strategy in the management of PCa. Although a majority of PCa patients respond to androgen suppression, initially, they eventually progress to castration-resistant prostate cancer (CRPC) [7, 8].

Recent advances in magnetic resonance imaging (MRI) of the prostate gland have improved our ability to detect and stage prostate adenocarcinoma, and multiparametric MRI further facilitated clinical risk assessment and predicting outcomes in prostate cancer [9]. Moreover, MRI/TRUS biopsy is now recommended by the American Urological Association for patients undergoing repeated prostate biopsies [10]. However, MRI may miss up to 20% of clinically significant cancers; it has low sensitivity for the detection of lymphadenopathy, and specificity is also limited [11–14]. Prostate adenocarcinoma in the peripheral zone shows low signal intensity that is easily distinguished from the normal high-signal peripheral zone, but the low signal intensity is nonspecific and may also be seen in benign conditions, such as prostatitis and post-radiation fibrosis.

Molecular imaging in PCa is continuously evolving in parallel with greater understanding of the underlying biological heterogeneity, which is characteristic of the disease and is critical for risk stratification and selection of the treatment strategy.  $^{11}\text{C}$ -choline, 1-amino-3- $^{18}\text{F}$ -fluorocyclobutyl-1-carboxylic acid [ $^{18}\text{F}$ -FACBC]) and  $^{223}\text{Ra}$ -dichloride radionuclide therapies have been approved by the U.S. Food and Drug Administration for clinical use in PCa [15–17]. In addition, PET/CT with sodium fluoride is now being utilized clinically and shows greater sensitivity for detection of bone metastasis [18]. However,  $^{18}\text{F}$ - and  $^{11}\text{C}$ -labeled choline have low sensitivity and specificity, especially in patients with low PSA levels [19–22].

Prostate-specific membrane antigen (PSMA), also known as folate hydrolase I or glutamate carboxypeptidase II, is an outstanding target for imaging and treatment [23]. PSMA is overexpressed on prostatic cancer cell surfaces, including advanced-stage prostate carcinoma cells, and in the tumor neovasculature, but is weakly expressed in normal prostate tissues [24–26]. PSMA expression is further increased in patients with metastatic disease and/or those who have progressed to a hormone-refractory state [27,28]. PSMA levels increase with upstaging and increased tumor grade [29–32]. Moreover, long-term androgen-depriving therapy may increase tumoral PSMA expression, thereby facilitating metastasis. In the last two years, increases

in the sensitivity and specificity of  $^{68}\text{Ga}$ - and  $^{18}\text{F}$ -labeled small-molecule PSMA inhibitors has enabled improved staging and detection of recurrence and metastasis in large numbers of patients. Furthermore, the ability of PSMA PET to localize recurrence in patients with rising PSA levels appears to be markedly superior to other clinically available imaging [33–35]. In this prospective study, the clinical utility of [ $^{68}\text{Ga}$ ]Glu-urea-Lys(Ahx)-HBED-CC ( $^{68}\text{Ga}$ -PSMA-11) PET/CT for staging and risk stratification of treatment-naïve PCa was validated. The diagnostic value for patients with metastatic castrate-resistant prostate cancer (mCRPC) was also addressed. To our knowledge, this is the first report on the use of  $^{68}\text{Ga}$ -PSMA-11 for the diagnosis of PCa in a Chinese population.

## RESULTS

### Patient characteristics

Among the 40 consecutive patients were included in this study (Table 1), the median patient age was 74 years (range, 53–91 years). Median serum PSA level at the time of imaging was 117.05 ng/ml (range 0.01–12,356.00 ng/ml). Among the 18 patients with mCRPC, PSA levels ranged from 4.05 to 12,356 ng/ml ( $2384.95 \pm 4135.96$  ng/ml), whereas PSA levels ranged from 0.04 to 7,890 ng/ml ( $1247.57 \pm 2150.77$  ng/ml) among treatment-naïve PCa patients. The median Gleason score was 8 (range, 6–9).

Pathology and clinical follow-up confirmed there were 29 patients with bone metastasis, 15 with lymph node metastasis, 4 with liver metastasis, and 5 with lung metastasis (for the  $\text{SUV}_{\text{max}}$  of the metastases, see Table 2). Radical prostatectomy was performed on four patients with localized PCa, who exhibited no abnormal  $^{68}\text{Ga}$ -PSMA-11 uptake, except in the primary prostatic lesion. In 17 patients with treatment-naïve PCa, more lesions were found using  $^{68}\text{Ga}$ -PSMA-11 uptake than CT or MRI. Those patients were upstaged and avoided radical prostatectomy.

### $^{68}\text{Ga}$ -PSMA-11 image interpretation

No adverse events were observed in this study. The biodistribution of  $^{68}\text{Ga}$ -PSMA-11 was favorable, with only mild or moderate uptake into the salivary glands and small intestine (Supplementary Table 1). The  $\text{SUV}_{\text{max}}$  in the salivary glands, small intestine, liver, kidneys, and lungs was  $14.42 \pm 5.91$ ,  $9.47 \pm 4.99$ ,  $3.99 \pm 2.11$ ,  $36.06 \pm 11.7$ , and  $11.32 \pm 0.53$ , respectively. High-contrast images were obtained, even with a low dose of  $^{68}\text{Ga}$ -PSMA-11 (135.67 MBq). Prostatic primary lesions and metastatic sites showed significantly greater uptake, and T/NT ratios ranged from 1.54 to 207.85; the highest T/NT ratios were at sites of bone metastasis ( $45.95 \pm 45.78$ ) and lymphadenopathy ( $13.85 \pm 9.20$ ) (Supplementary Figure 1). All 22 treatment-naïve PCa

**Table 1: Patient characteristics**

| Characteristics           |                            |
|---------------------------|----------------------------|
| Age, years                | 74 (53-91)                 |
| Gleason score             | 8 (6-9)                    |
| Initial PSA level, ng/ml  | 117.05 (0.01-12356.0)      |
| Time since diagnosis      | 1 week to 9 years          |
| <b>Metastatic lesions</b> |                            |
| Bone metastasis           | 109 lesions in 29 patients |
| Lymph node metastasis     | 105 lesions in 15 patients |
| Liver metastasis          | 9 lesions in 4 patients    |
| Lung metastasis           | 6 lesions in 5 patients    |

Data are expressed as the number or the median (range).

**Table 2: SUV<sub>max</sub> of primary prostatic lesion and metastasis on <sup>68</sup>Ga-PSMA-11 images**

| Lesions                          | SUV <sub>max</sub> |
|----------------------------------|--------------------|
| Primary prostatic lesion (whole) | 15.87 ± 11.43      |
| Diagnosed treatment-naïve PCa    | 17.09 ± 11.08      |
| mCRPC                            | 13.44 ± 12.31      |
| Lymph node metastasis            | 14.54 ± 9.66       |
| Bone metastasis                  | 27.57 ± 19.71      |
| Lung metastasis                  | 5.07 ± 1.83        |
| Liver metastasis                 | 20.63 ± 10.92      |

Data are expressed as the mean ± SD.

PCa: prostate cancer, mCRPC: metastatic castration-resistant prostate cancer.

patients had PSMA-avid lesions. Of the 18 patients with mCRPC, 15 had PSMA-avid lesions.

## Staging and clinical management

### Primary prostatic lesion

In treatment-naïve PCa patients (Gleason score 6-9), all prostatic primary lesions were PSMA-avid on <sup>68</sup>Ga-PSMA-11 images (SUV<sub>max</sub> 17.09 ± 11.08). In 4 patients, no extraprostatic lesions were found. One patient who was scheduled with local radical prostatectomy had 3 pelvic lymph nodule metastases in addition to his prostatic lesion. Ten patients with mCRPC were administered androgen depriving and chemotherapy. These patients were not treated with radical prostatectomy due to their advanced stage, with multiple lymph node and bone metastases. The prostatic primary lesions were visualized using high focal uptake (SUV<sub>max</sub> 13.33 ± 12.31, n=10). Pelvic MRIs showed a hypo-intensity T2WI signal in the peripheral zone of the cancerous prostate, and some

patients exhibited invasion of peripheral organs, including the seminal vesicles. <sup>68</sup>Ga-PSMA-11 PET/CT enabled precise definition of the prostatic primary lesion and was consistent with the MRI findings. A representative case is shown in Figure 1.

### Lymphadenopathy and remote metastasis

In the 15 patients with lymph node metastasis, <sup>68</sup>Ga-PSMA-11 PET/CT revealed a total of 105 metastatic lymph nodes, with SUV<sub>max</sub> values of 14.54 ± 9.66 and sizes ranging from 3.0 to 33.5 mm (9.96 ± 6.21 mm). The SUV<sub>max</sub> of the metastatic nodes was 16.85 ± 9.70 and 7.54 ± 5.20 in treatment-naïve PCa and mCRPC, respectively. Eight patients with treatment-naïve PCa showed metastasis to multiple lymph nodes, including the mediastinal, supraclavicular, subclavicular, and hilar nodes. A representative case is shown in Figure 2. It is noteworthy that 2 patients, multiple lymph node metastases and showing iliac lymph node involvement exhibited limb edema. In addition, lymph nodule

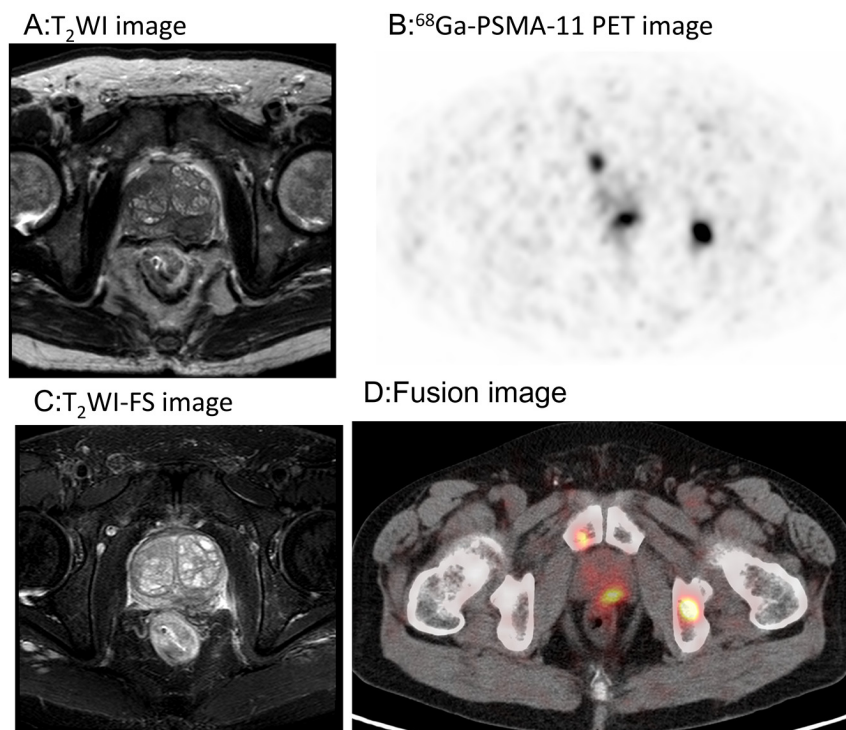

**Figure 1:**  $^{68}\text{Ga}$ -PSMA-11PET/CT versus MRI for the evaluation of the primary prostatic lesions. Focal uptake was found in the left peripheral zone of the prostate gland, which matched the hypointensity signal on MRI. **A.** T<sub>2</sub>WI image. **B.**  $^{68}\text{Ga}$ -PSMA-11 PET transverse image. **C.** T<sub>2</sub>WI-FS image. **D.** Fusion image.

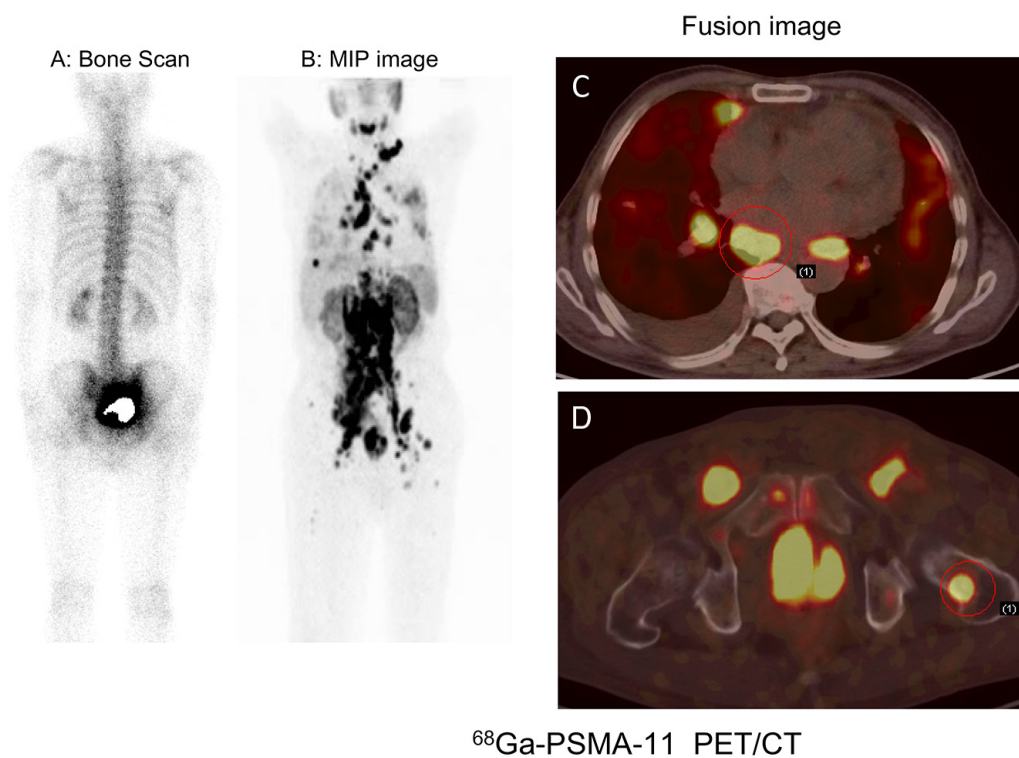

**Figure 2:**  $^{68}\text{Ga}$ -PSMA-11 PET/CT versus bone scan for the evaluation of multiple metastases in a 73-year-old patient with right leg edema. Besides the primary prostatic lesion, multiple PSMA-avid lesions in lymph node and bone metastases were detected on  $^{68}\text{Ga}$ -PSMA-11 images. **A.** Bone scan. **B, C, D.**  $^{68}\text{Ga}$ -PSMA-11 images: **B,** MIP image; **C,** thoracic fusion image; **D,** Pelvic fusion image.

enlargement was associated with compression of ureter in 1 patient, which led to obstruction and hydronephrosis.

In 29 patients with bone metastasis,  $SUV_{max}$  ranged from 3.00 to 124.71 ( $27.57 \pm 27.46$ ). In 3 patients with stable disease, the PSA values ranged from 0.01 to 0.07 ng/ml, and no  $^{68}\text{Ga}$ -PSMA-11 uptake was observed, including into osteoblastic bone lesions. Of the 22 patients with treatment-naïve PCa, 17 had multiple lymph node and bone metastases. Based on these findings, these patients initially received hormonal treatment and radiotherapy or chemotherapy. For those with only pelvic lymph node positivity, radiotherapy was considered depending on the magnitude of PSA decline after hormone deprivation. In one patient with spinal cord involvement ( $SUV_{max} = 124.71$ ), multiple lymph node and bone metastases were found in  $^{68}\text{Ga}$ -PSMA-11 images (Figure 3). In addition,  $^{68}\text{Ga}$ -PSMA-11 PET/CT newly detected lung metastasis in 5 patients and liver metastasis in 4 patients (Figures 4 and 5). In total, 17 patients with treatment-naïve PCa were upstaged after  $^{68}\text{Ga}$ -PSMA-11 PET/CT.

### PSMA expression

Immunohistochemistry confirmed that PSMA was significantly overexpressed in the primary prostatic lesions, which was consistent with the PSMA-avid lesions in  $^{68}\text{Ga}$ -PSMA-11 images. This finding was further confirmed in western blot and immunofluorescence analyses (Figure 6 and Supplementary Figure 2).

## DISCUSSION

$^{68}\text{Ga}$ - and  $^{18}\text{F}$ -labeled small-molecule PSMA inhibitors previously showed potential utility for detection

of metastatic spread of recurrent PCa [36–37]. Further large-scale clinical studies validated the exceptionally high accuracy of this approach for detection of recurrent prostate cancer [38–39]. In the present prospective study,  $^{68}\text{Ga}$ -PSMA-11 PET/CT accurately localized the primary prostatic lesion and metastasis in treatment-naïve prostate cancer patients, and significantly improved detection rate of the malignant lesions in patients with mCRPC, even when PSA levels were low.

$^{68}\text{Ga}$ -PSMA-11 showed high sensitivity for the detection of primary prostatic lesions. All primary lesions in treatment-naïve prostate cancer patients showed high focal uptake with 100% sensitivity. In 10 patients with mCRPC, who did not receive radical prostatectomy,  $^{68}\text{Ga}$ -PSMA-11 PET/CT also revealed a PSMA-avid lesion in the prostate gland. With the use of endorectal coils, MRI has become an essential tool for localization of the primary lesion and accurate staging of PCa, especially T staging [40]. However, the low specificity of MRI limits its clinical value [41]. By contrast,  $^{68}\text{Ga}$ -PSMA-11 PET/CT combined with MRI could be used for T staging, enabling accurate evaluation of T staging of prostate cancer, which would have great impact on clinical management.

$^{68}\text{Ga}$ -PSMA-11 PET/CT also showed high sensitivity for detection of metastatic lymph nodes. A total of 105 lymph node metastases, ranging in size from 3 to 35.5 mm, were detected using  $^{68}\text{Ga}$ -PSMA-11. By contrast, CT and MRI have low sensitivity for lymph node metastasis, with detection only of lesions >10 mm in diameter. Consequently, CT and MRI may fail to detect microscopic invasion of the lymph nodes [42,43]. In the present study, multiple lymph node involvements affecting the mediastinum, retroperitoneum and pelvis were detected in 8 patients using  $^{68}\text{Ga}$ -PSMA-11 PET/CT, but

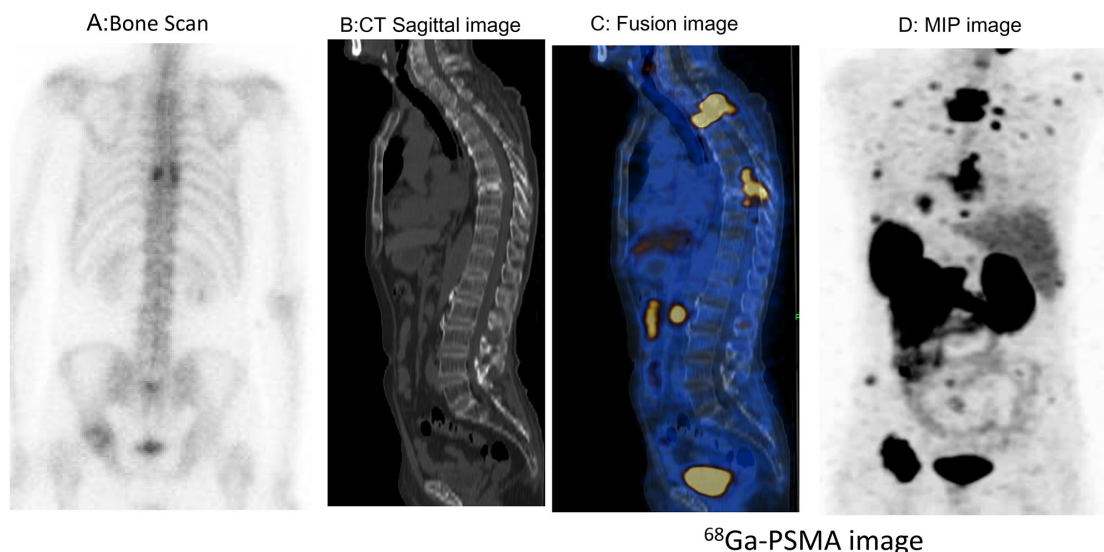

**Figure 3: Thoracic spinal cord invasion was detected on  $^{68}\text{Ga}$ -PSMA-11 PET/CT images in a patient with mCRPC.** Multiple PSMA-avid lesions in the thoracic spine, ribs and pelvis were also detected. The spinal cord was also involved ( $SUV_{max} = 110$ ). **A.** Bone scan. **B.** CT image. **C, D.**  $^{68}\text{Ga}$ -PSMA-11 PET /CT images: C, fusion image; D, MIP projection.

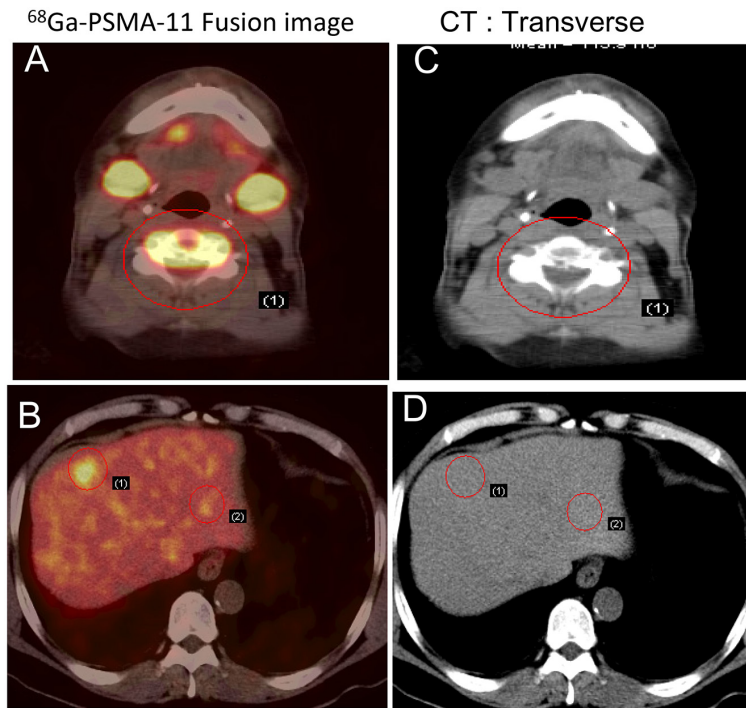

**Figure 4: Early detection of PCa metastasis on  $^{68}\text{Ga}$ -PSMA-11 PET/CT images.** Two years after androgen-deprivation therapy, a patient with mCRPC showed elevated PSA (5.2 ng/ml) and moderate uptake in the fifth cervical vertebra on a bone scan. PSMA avid lesions were at C5 and in the liver. **A, B.**  $^{68}\text{Ga}$ -PSMA-11 PET/CT fusion image. **C, D.** CT image.

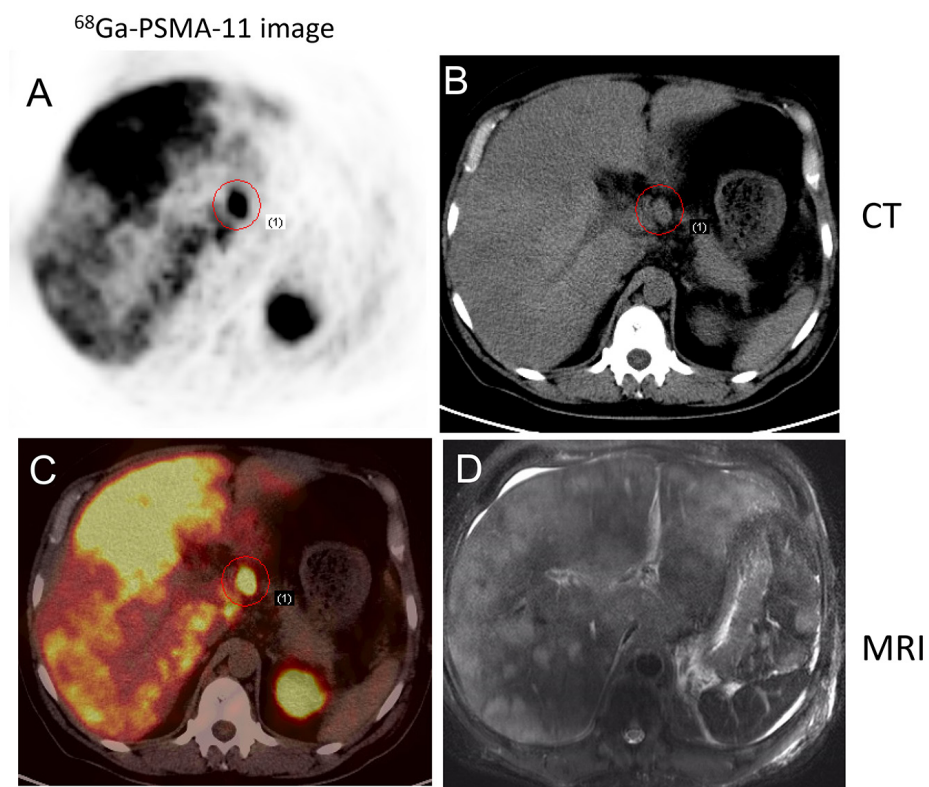

**Figure 5:  $^{68}\text{Ga}$ -PSMA-11 PET/CT versus T2WI MRI in a 52-year-old patient with progressive disease.** PCa was confirmed by lymph node aspiration; the serum PSA level was >10,000 ng/ml at the time of imaging.  $^{68}\text{Ga}$ -PSMA-11 PET/CT detected multiple lymph node and liver metastases. **A.** Transverse image. **B.** CT. **C.** Multiple sites of focal uptake in the liver. **D.** MRI.

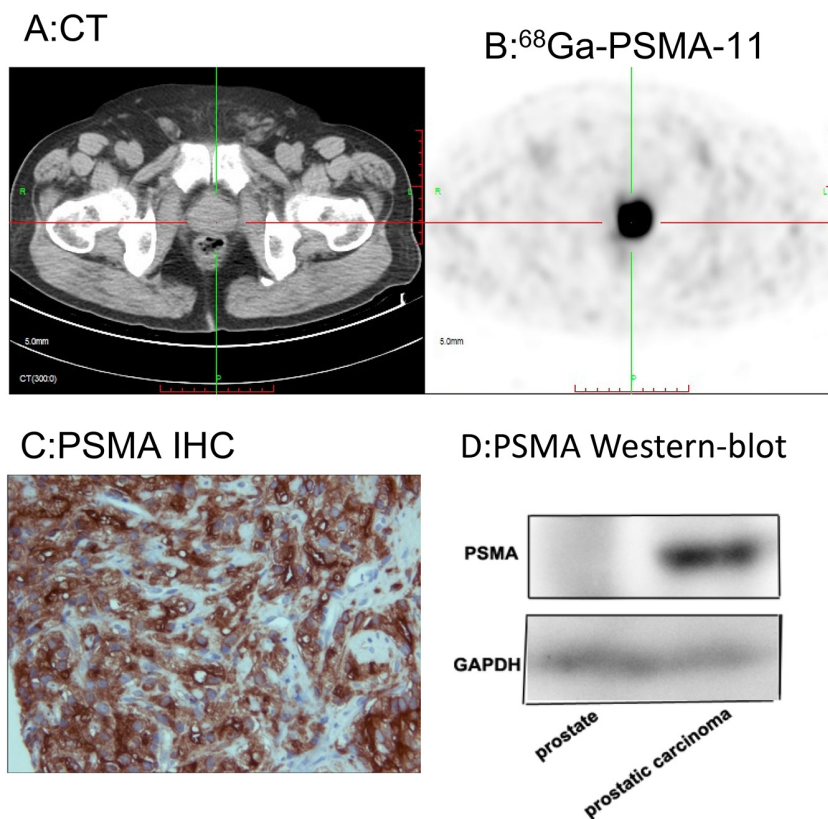

**Figure 6:** <sup>68</sup>Ga-PSMA-11 PET/CT enables quantitation of PSMA expression in the primary lesion, which was consistent with histopathological analysis. <sup>68</sup>Ga-PSMA-11 PET/CT showed high focal uptake in the primary prostatic lesion. A. CT image. B. Fusion image. C. PSMA immunostaining. D. Western blot.

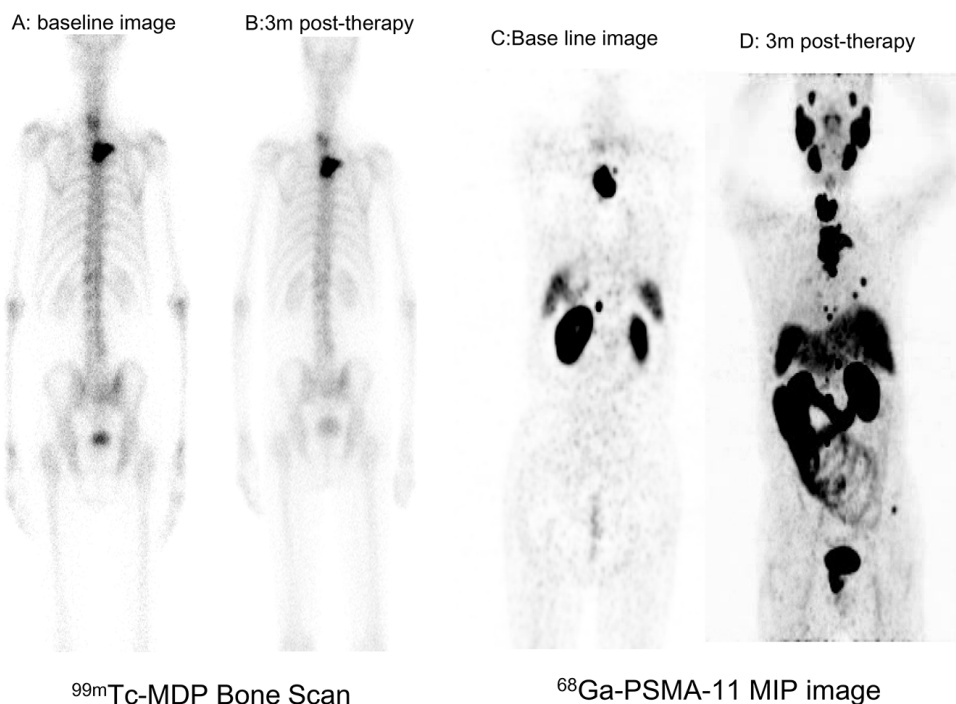

**Figure 7:** Serial <sup>68</sup>Ga-PSMA-11 images in a case with progressive mCRPC. A, B. Bone scan showing no changes in a patient with mCRPC after ADT therapy. C, D. <sup>68</sup>Ga-PSMA-11 PET/CT revealed multiple metastases and progression compared to a baseline image.

were negative on CT and/or MRI. Thus,  $^{68}\text{Ga}$ -PSMA-11 PET/CT has some merit for N staging in prostate cancer. It is noteworthy that iliac lymph node involvement may lead to limb edema and ureter obstruction and hydronephrosis. Thus if a male patient presents with limb edema or hydronephrosis, prostate cancer with iliac lymph node metastasis should be suspected.

In this study,  $^{68}\text{Ga}$ -PSMA-11 PET/CT revealed visceral metastasis in 9 patients (22.5%), lung metastasis in 5 patients, and liver metastasis in 4 patients. This incidence of visceral metastasis is significantly higher than previously reported [44], in large part because liver and lung metastases have traditionally been relatively rare events even in mCRPC. The high incidence of visceral metastasis in the present study may be related to the unique behavior of PCa in Chinese ethnics. The distribution of metastases in advanced prostate cancer is prognostic. Visceral involvement, especially liver and lung metastasis, associates with increased disease lethality, and patients with visceral metastasis have poorer survival than those with bone metastasis and nonvisceral involvement [44].  $^{68}\text{Ga}$ -PSMA-11 PET/CT was valuable for localization of less common metastatic lesions that were not visible on conventional images.

Bone scans have little diagnostic value for cervical vertebral lesions.  $^{68}\text{Ga}$ -PSMA-11 PET/CT improved the sensitivity for detection of affected cervical vertebrae and rare metastases, such as those of the head and distal extremities. Bone metastasis showed the highest uptake in  $^{68}\text{Ga}$ -PSMA-11 images, the ratio of metastatic bone lesion to normal bone tissue was high (Figure 7). Hematogenous metastasis via the vertebral venous plexus is the primary metastatic pathway of PCa, and  $^{68}\text{Ga}$ -PSMA-11 PET/CT also exhibited high sensitivity for the detection of spinal cord invasion. PSMA-based therapy provides an alternative strategy to treatment of bone metastasis, and it provides guidance for bone-seeking radiotracer therapy with  $^{89}\text{Sr}$  and  $^{223}\text{Ra}$ . If, however, spinal cord invasion is confirmed, radionuclide therapy is contraindicated. Thus,  $^{68}\text{Ga}$ -PSMA-11 PET/CT has utility for M staging, and can be used for risk stratification and selection of treatment strategy.

PSMA was significantly overexpressed in primary prostatic lesions. Use of  $^{68}\text{Ga}$ -PSMA-11 could enable quantification of tumoral PSMA expression, which would be useful for selection of biopsy sites in patients with unknown primary lesions, and might even be critical for PSMA-based theranostics.

This small cohort study demonstrated that  $^{68}\text{Ga}$ -PSMA-11 PET/CT has high sensitivity and specificity for localization of primary prostatic lesions and metastatic sites, and enabled precise staging and risk stratification in patients with treatment-naïve PCa.  $^{68}\text{Ga}$ -PSMA-11 PET/CT also showed high sensitivity for detection of metastasis and recurrence in patients with mCRPC, even when PSA levels were low. The sensitivity was much higher than in

other studies, likely due to the presence of more extensive metastatic disease and higher Gleason scores in our patient cohort, or perhaps to biological factors unique to Chinese ethnics.  $^{68}\text{Ga}$ -PSMA-11 PET/CT played an important role in staging and detection of remote and uncommon metastatic sites. This imaging modality might therefore be effectively utilized for evaluation of biological behavior and risk stratification in PCa. Our understanding of what drives the development of different metastatic patterns in PCa is limited.  $^{68}\text{Ga}$ -PSMA-11 PET/CT has the potential to shed new light on the mechanisms underlying PCa metastasis and to serve as the basis for development of novel treatment approaches for Chinese men with prostate carcinoma.

## MATERIALS AND METHODS

A total of 40 patients with PCa (22 patients with biopsy-proven, naïvely diagnosed PCa and 18 patients with mCRPC) were prospectively enrolled in this study conducted at Nanjing First Hospital from January to December 2015. All patients gave written informed consent. All reported investigations were conducted in accordance with the Declaration of Helsinki and with our national regulations. All patients underwent PET/CT 1 h after injection of  $^{68}\text{Ga}$ -PSMA-11. MRI was performed to evaluate the primary prostatic lesion and peripheral invasion, and a  $^{99\text{m}}\text{Tc}$ -MDP bone scan was performed to evaluate bone metastasis. Gleason scores were calculated based on aspiration biopsies or surgery samples.

### Preparation of $^{68}\text{Ga}$ -PSMA-11 and quality control

$^{68}\text{Ga}$ -PSMA-11 was prepared with an ITG semi-automated module (Germany, Munich). Radiochemical purity and stability were determined using analytical reverse phase high-performance liquid chromatography.  $^{68}\text{Ga}$ -PSMA-11 was stable *in vitro*, its radiochemical purity was >99% after 2 h of radiolabeling. All products were prepared using good manufacturing practices and were nonpyrogenic and sterile.

### Imaging protocol

All patients underwent PET/CT in a Biograph HR scanner (Siemens, Erlangen, Germany) 60 min after intravenous injection of  $^{68}\text{Ga}$ -PSMA-11 (median, 131.72 MBq, range 130.6-177.6 MBq). First, a CT scan (130 keV, 80 mAs) was obtained without using contrast medium. Static emission scans, corrected for dead time, scatter and decay, were acquired from the vertex to the proximal legs. This required the patient assume 8 bed positions with 3 min per bed position. The images were iteratively reconstructed and included CT-based attenuation correction with the OSEM algorithm



using 4 iterations with 8 subsets and Gaussian filtering to an in-plane spatial resolution of 5 mm at full-width at half-maximum. For calculation of the standardized uptake value (SUV), circular regions of interest were drawn around the area with focally increased uptake in transaxial slices and automatically adapted to a three-dimensional volume of interest using e.soft software (Siemens) at 50% isocontour. If a patient was suspected of having metastasis to the head or extremities, a head-to-toe protocol was used, with identical parameters for all patients. Datasets were fully corrected for random coincidences, scatter radiation, and attenuation. Corrected images were assessed clinically by certified nuclear medicine physicians.

MRI was performed using an eight-channel torso phase-array coil at 3 Tesla (Phillips, Gyroscan ACS-NT). In brief, T1- and T2-weighted sequences and diffusion-weighted images (DWI) were acquired. Pelvic assessment and lymph node staging was accomplished using 5-mm T2W turbo spin echo (TSE) transverse and coronal short-tau inversion recovery (STIR) sequences. For the prostate gland, 3-mm endorectal T2W spin echo (SE) sagittal, transverse, and coronal sequences were acquired. A reference slice was defined in the central part of the organ, measured from the prostate base. All patients had T1WI, T2WI, and T2WI-FS scans in three planes (transverse, coronal, and sagittal).

### **PET/CT image interpretation**

The physiologic activities of  $^{68}\text{Ga}$ -PSMA-11 in the parotid and submandibular glands as well as organs such as lung, liver, spleen, bowel, and kidney were determined and expressed as the maximum standardized uptake value ( $\text{SUV}_{\text{max}}$ ) on images obtained 1 h post-injection. Images were interpreted by three experienced nuclear medicine physicians based on visual assessment. Final decisions were reached by consensus. A positive scan was defined as one showing abnormal focal increases in tracer activity within a lesion with an intensity level higher against a surrounding background considered to be malignant. Any hilar or mediastinal lymph node activity greater than the mediastinal activity was regarded as an abnormal. Any distant focally increased tracer activity that did not correspond to a normal physiological structure was considered to be a metastatic lesion. The malignant lesion to normal tissue (T/NT) ratio was calculated based on ratio of the  $\text{SUV}_{\text{max}}$  of the lesions to the contralateral normal tissue.

### **Anatomical image interpretation**

The initial staging of PCa was based on findings from conventional imaging techniques, including ultrasonography, enhanced CT and MRI, bone scans, and fine needle aspiration biopsies when required/needed. Any sign of enlargement of the prostate gland,

heterogeneous density, small patchy calcifications, and/or invasion of peripheral organs on CT, was regarded as abnormal. Any sign of heterogeneous signal intensities, signal hypointensity in the peripheral zone, invasion of the prostate capsule or seminal vesicle, or enlarged pelvic lymph nodes on MRI was regarded as a cancerous lesion. Considering lymphadenopathy, a lymph node was accepted as pathologic if the short axis diameter was  $>1.0$  cm on transaxial CT or MRI images.

### **PSMA expression in the primary prostatic lesion: immunohistochemistry and immunofluorescent staining**

Tissue samples were fixed with 5% formaldehyde, embedded in paraffin, and cut into consecutive 5  $\mu\text{m}$  sections using standard procedures. The sections were incubated first with primary anti-PSMA monoclonal antibody overnight at  $4^{\circ}\text{C}$ . Then after three washes with PBS, sections were incubated with horseradish peroxidase (HRP)-labeled secondary antibody for 1 h at room temperature. The bound antibody complexes were detected using a diaminobenzidine detection system, after which the slides were counterstained with hematoxylin. Alternatively, for immunofluorescent staining, sections were incubated with a fluorescently labeled secondary antibody for 1 h at room temperature in the dark, after which nuclei were counterstained using 4, 6-diamidino-2-phenylindole. Immunostained images were observed with microscope (Leica DM IL).

### **Statistical analysis**

The sensitivity, specificity, and accuracy of each imaging modality were calculated. Descriptive data are presented as the mean and standard deviation (SD) for normally distributed variables. Paired Student's *t*-test was used to evaluate differences among normally and non-normally distributed variables. Values of  $p < 0.05$  were considered significant. SPSS 21.0 software was used for analysis.

### **ACKNOWLEDGMENTS**

We are grateful to Prof. Ming-Rong Zhang for his help in manuscript revision and the colleagues of urology surgery for clinical data collection and follow-up.

### **CONFLICTS OF INTEREST**

There are no conflicts of interest to declare.

### **GRANT SUPPORT**

This research was supported by grants from National Natural Science Foundation of China (81271604, 81171383, 81071176), Jiangsu Provincial Nature Science

Foundation (BL2012037, BK2011104), the National Institute of Health (R01 HL102085, 5R01CA185214), and the Science and technology developing project of the science and technology bureau of Suzhou city (No. SYS 201339).

## REFERENCES

1. Jemal A, Bray F, Center MM, Ferlay J, Ward E, Forman D. Global cancer statistics. *CA Cancer J Clin.* 2011;61:69–90.
2. Resnick MJ, Koyama T, Fan KH, Albertsen PC, Goodman M, Hamilton AS, Hoffman RM, Potosky AL, Stanford JL, Stroup AM, Van Horn RL, Penson DF. Long-term functional outcomes after treatment for localized prostate cancer. *N Engl J Med.* 2013;368:436–445.
3. Predeger EJ, O'Malley M, Hendrix T, Parker NM. Quality of life and satisfaction with outcome among prostate-cancer survivors. *N Engl J Med.* 2008;358:1250–1261.
4. Wang M, Takahashi A, Liu F, Ye D, Ding Q, Qin C, Yin C, Zhang Z, Matsuda K, Kubo M, Na R, Lin X, Jiang H, et al. Large-scale association analysis in Asians identifies new susceptibility loci for prostate cancer. *Nat Commun.* 2015;6:8469.
5. Ye D, Zhu Y. Epidemiology of prostate cancer in China: an overview and clinical implication. [Article in Chinese]. *Zhonghua Wai Ke Za Zhi.* 2015;53:249–252.
6. Xu J, Mo Z, Ye D, Wang M, Liu F, Jin G, Xu C, Wang X, Shao Q, Chen Z, Tao Z, Qi J, Zhou F, et al. Genome-wide association study in Chinese men identifies two new prostate cancer risk loci at 9q31.2 and 19q13.4. *Nat Genet.* 2012;44:1231–1235.
7. Yang M, Xie W, Mostaghel E, Nakabayashi M, Werner L, Sun T, Pomerantz M, Freedman M, Ross R, Regan M, Sharifi N, Figg WD, Balk S, et al. SLCO2B1 and SLCO1B3 may determine time to progression for patients receiving androgen deprivation therapy for prostate cancer. *J Clin Oncol.* 2011;29:2565–2573.
8. Schulman C, Cornel E, Matveev V, Tammela TL, Schraml J, Bensadoun H, Warnack W, Persad R, Salagierski M, Gómez Veiga F, Baskin-Bey E, López B, Tombal B. Intermittent versus continuous androgen deprivation therapy in patients with relapsing or locally advanced prostate cancer: a phase iii randomised study (ICELAND). *Eur Urol.* 2016;69:720–727.
9. Rosenkrantz AB, Verma S, Choyke P, Eberhardt SC, Eggener SE, Gaitonde K, Haider MA, Margolis DJ, Marks LS, Pinto P, Sonn GA, Taneja SS. Prostate magnetic resonance imaging and magnetic resonance imaging targeted biopsy in patients with a prior negative biopsy: a consensus statement by AUA and SAR. *J Urol.* 2016; 169: 1613-1618.
10. Ahmad AE, Finelli A. Should prebiopsy multiparametric magnetic resonance imaging be offered to all biopsy-naive men undergoing prostate biopsy? *Eur Urol.* 2016;69:426–427.
11. Roethke MC, Kuru TH, Schultze S, Tichy D, Kopp-Schneider A, Fenchel M, Schlemmer HP, Hadaschik BA. Evaluation of the ESUR PI-RADS scoring system for multiparametric MRI of the prostate with targeted MR/TRUS fusion-guided biopsy at 3.0 Tesla. *Eur Radiol.* 2014;24:344–352.
12. Li Y, Mongan J, Behr SC, Sud S, Coakley FV, Simko J, Westphalen AC. Beyond prostate adenocarcinoma: expanding the differential diagnosis in prostate pathologic conditions. *Radiographics.* 17, 2016:150226 [Epub ahead of print].
13. Verma S, Rajesh A. A clinically relevant approach to imaging prostate cancer: review. *Am J Roentgenol.* 2011;196:S1–10.
14. Fütterer JJ, Briganti A, De Visschere P, Emberton M, Giannarini G, Kirkham A, Taneja SS, Thoeny H, Villeirs G, Villers A. Can clinically significant prostate cancer be detected with multiparametric magnetic resonance imaging? A systematic review of the literature. *Eur Urol.* 2015;68:1045–1053.
15. Fanti S, Minozzi S, Castellucci P, Balduzzi S, Herrmann K, Krause BJ, Oyen W, Chiti A. PET/CT with 11C-choline for evaluation of prostate cancer patients with biochemical recurrence: meta-analysis and critical review of available data. *Eur J Nucl Med Mol Imaging.* 2016;43:55–69.
16. Schuster DM, Nieh PT, Jani AB, Amzat R, Bowman FD, Halkar RK, Master VA, Nye JA, Odewole OA, Osunkoya AO. Anti-3-[18F]FACBC positron emission tomography-computerized tomography and 111In-capromab pendetide single photon emission computerized tomography-computerized tomography for recurrent prostate carcinoma: results of a prospective clinical trial. *J Urol.* 2014;191:1446–1453.
17. Parker C, Nilsson S, Heinrich D, Helle SI, O'Sullivan JM, Fossa SD, Chodacki A, Wiechno P, Logue J, Seke M, Widmark A, Johannessen DC, Hoskin P, et al. Alpha emitter radium-223 and survival in metastatic prostate cancer. *N Engl J Med.* 2013;369:213–223.
18. Rohren EM, Etchebehere EC, Araujo JC, Hobbs BP, Swanston NM, Everding M, Moody T, Macapinlac HA. Determination of skeletal tumor burden on 18F-fluoride PET/CT. *J Nucl Med.* 2015;56:1507–1512.
19. Schmid DT, John H, Zweifel R, Cservenyak T, Westera G, Goerres GW, von Schulthess GK, Hany TF. Fluorocholine PET/CT in patients with prostate cancer: initial experience. *Radiology.* 2005;235:623–628.
20. Igerc I, Kohlfürst S, Gallowitsch HJ, Matschnig S, Kresnik E, Gomez-Segovia I, Lind P. The value of 18F-Choline PET/CT in patients with elevated PSA-level and negative prostate needle biopsy for localisation of prostate cancer. *Eur J Nucl Med Mol Imaging.* 2008;35:976–983.

21. Husarik DB, Miralbell R, Dubs M, John H, Giger OT, Gelet A, Cservenyak T, Hany TF. Evaluation of [<sup>18</sup>F]-choline PET/CT for staging and restaging of prostate cancer. *Eur J Nucl Med Mol Imaging*. 2008;35:253–263.
22. Cimitan M, Bortolus R, Morassut S, Canzonieri V, Garbeglio A, Baresic T, Borsatti E, Drigo A, Trovò MG. 18F-fluorocholine PET/CT imaging for the detection of recurrent prostate cancer at PSA relapse: experience in 100 consecutive patients. *Eur J Nucl Med Mol Imaging*. 2006; 33:1387–1398.
23. Davis MI, Bennett MJ, Thomas LM, Bjorkman PJ. Crystal structure of prostate-specific membrane antigen, a tumor marker and peptidase. *Proc Natl Acad Sci U S A*. 2005;102:5981–5986.
24. Silver DA, Pellicer I, Fair WR, Heston WD, Cordon-Cardo C. Prostate specific membrane antigen expression in normal and malignant human tissues. *Clin Cancer Res*. 1997;3:81–85.
25. Ross JS, Sheehan CE, Fisher HA, Kaufman RP Jr, Kaur P, Gray K, Webb I, Gray GS, Mosher R, Kallakury BV. Correlation of primary tumor prostate-specific membrane antigen expression with disease recurrence in prostate cancer. *Clin Cancer Res*. 2003;9:6357–6362.
26. Wright GL Jr, Grob BM, Haley C, Grossman K, Newhall K, Petrylak D, Troyer J, Konchuba A, Schellhammer PF, Moriarty R. Upregulation of prostate-specific membrane antigen after androgen-deprivation therapy. *Urology*. 1996;48:326–334.
27. Sweat SD, Pacelli A, Murphy GP, Bostwick DG. Prostate-specific membrane antigen expression is greatest in prostate adenocarcinoma and lymph node metastases. *Urology*. 1998;52:637–640.
28. Perner S, Hofer MD, Kim R, Shah RB, Li H, Möller P, Hautmann RE, Gschwend JE, Kuefer R, Rubin MA. Prostate-specific membrane antigen expression as a predictor of prostate cancer progression. *Hum Pathol*. 2007;38:696–701.
29. Kasperzyk JL, Finn SP, Flavin R, Fiorentino M, Lis R, Hendrickson WK, Clinton SK, Sesso HD, Giovannucci EL, Stampfer MJ, Loda M, Mucci LA. Prostate-specific membrane antigen protein expression in tumor tissue and risk of lethal prostate cancer. *Cancer Epidemiol Biomarkers Prev*. 2013;22:2354–63.
30. Rajasekaran SA, Anilkumar G, Oshima E, Bowie JU, Liu H, Heston W, Bander NH, Rajasekaran AK. A novel cytoplasmic tail motif mediates the internalization of prostate-specific membrane antigen. *Mol Biol Cell*. 2003;14:4835–4845.
31. Chang SS. Overview of prostate-specific membrane antigen. *Rev Urol*. 2004;6:S13–18.
32. Minner S, Wittmer C, Graefen M, Salomon G, Steuber T, Haese A, Huland H, Bokemeyer C, Yekebas E, Dierlamm J, Balabanov S, Kilic E, Wilczak W, et al. High level PSMA expression is associated with early PSA recurrence in surgically treated prostate cancer. *Prostate*. 2011;71:281–288.
33. Mannweiler S, Amersdorfer P, Trajanoski S, Terrett JA, King D, Mehes G. Heterogeneity of prostate-specific membrane antigen (PSMA) expression in prostate carcinoma with distant metastasis. *Pathol Oncol Res*. 2009;15:167–172.
34. Afshar-Oromieh A, Avtzi E, Giesel FL, Holland-Letz T, Linhart HG, Eder M, Eisenhut M, Boxler S, Hadaschik BA, Kratochwil C, Weichert W, Kopka K, Debus J, et al. The diagnostic value of PET/CT imaging with the 68Ga-labelled PSMA ligand HBED-CC in the diagnosis of recurrent prostate cancer. *Eur J Nucl Med Mol Imaging*. 2015;42:197–209.
35. Budäus L, Leyh-Bannurah SR, Salomon G, Michl U, Heinzer H, Huland H, Graefen M, Steuber T, Rosenbaum C. Initial experience of Ga-PSMA PET/CT imaging in high-risk prostate cancer patients prior to radical prostatectomy. *Eur Urol*. 2016;69:393–396.
36. Rowe SP, Mana-Ay M, Javadi MS, Szabo Z, Leal JP, Pomper MG, Pienta KJ, Ross AE, Gorin MA. PSMA-based detection of prostate cancer bone lesions with 18F-DCFPyL PET/CT: a sensitive alternative to 99mTc-MDP bone scan and Na18F PET/CT? *Clin Genitourin Cancer*. 2016;14:e115–e118.
37. Szabo Z, Mena E, Rowe SP, Plyku D, Nidal R, Eisenberger MA, Antonarakis ES, Fan H, Dannals RF, Chen Y, Mease RC, Vranesic M, Bhatnagar A, et al. Initial evaluation of [(18)F]DCFPyL for prostate-specific membrane antigen (PSMA)-targeted PET imaging of prostate cancer. *Mol Imaging Biol*. 2015;17:565–574.
38. Eiber M1, Maurer T, Souvatzoglou M, Beer AJ, Ruffani A, Haller B, Graner FP, Kübler H, Haberhorn U, Eisenhut M, Wester HJ, Gschwend JE, Schwaiger M. Evaluation of hybrid 68Ga-PSMA ligand PET/CT in 248 patients with biochemical recurrence after radical prostatectomy. *J Nucl Med*. 2015;56:668–674.
39. Hövels AM, Heesakkers RA, Adang EM, Jager GJ, Strum S, Hoogeveen YL, Severens JL, Barentsz JO. The diagnostic accuracy of CT and MRI in the staging of pelvic lymph nodes in patients with prostate cancer: a meta-analysis. *Clin Radiol*. 2008;63:387–395.
40. Dickinson L, Ahmed HU, Allen C, Barentsz JO, Carey B, Futterer JJ, Heijmink SW, Hoskin P, Kirkham AP, Padhani AR, Persad R, Puech P, Punwani S, et al. Scoring systems used for the interpretation and reporting of multiparametric MRI for prostate cancer detection, localization, and characterization: could standardization lead to improved utilization of imaging within the diagnostic pathway? *J Magn Reson Imaging*. 2013;37:48–58.
41. Barrett T, Turkbey B, Choyke PL. PI-RADS version 2: what you need to know. *Clin Radiol*. 2015;70:1165–1176.
42. Giesel FL, Sterzing F, Schlemmer HP, Holland-Letz T, Mier W, Rius M, Afshar-Oromieh A, Kopka K, Debus J,

- Haberkorn U, Kratochwil C. Intra-individual comparison of <sup>68</sup>Ga-PSMA-11-PET/CT and multi-parametric MR for imaging of primary prostate cancer. *Eur J Nucl Med Mol Imaging*. 2016; 43:1400–1406.
43. Demirkol MO, Acar Ö, Uçar B, Ramazanoğlu SR, Sağlıcan Y, Esen T. Prostate-specific membrane antigen-based imaging in prostate cancer: impact on clinical decision making process. *Prostate*. 2015;75:748–757.
44. Halabi S, Kelly WK, Ma H, Zhou HJ, Solomon NC, Fizazi K, Tangen CM, Rosenthal M, Petrylak DP, Hussain M, Vogelzang NJ, Thompson IM, Chi KN, et al. Meta-analysis evaluating the impact of site of metastasis on overall survival in men with castration-resistant prostate cancer. *J Clin Oncol*. 2016;34:1652–1659.
